# Supplementary material for: An injectable ionic hydrogel inducing high temperature hyperthermia for microwave tumor ablation
Source: Royal Society of Chemistry journal article supplement (doi:10.1039/c7tb00556c), 2017-01-01
Supplement: c7tb00556c1.pdf [file c7tb00556c1.pdf]

# Supporting information

## An injectable ionic hydrogel inducing high temperature hyperthermia for microwave tumor ablation

Jingyun Wang,<sup>1, 2</sup> Dan Wang,<sup>1, 2</sup> Hao Yan,<sup>1, 2</sup> Lei Tao,<sup>3</sup> Yen Wei,<sup>3</sup> Yongsan Li,<sup>3,4</sup> Xing Wang,<sup>4</sup> Wei Zhao,<sup>5</sup> Yu Zhang,<sup>6</sup> Lingyun Zhao\*,<sup>1, 2</sup> and Xiaodan Sun\*,<sup>1, 2</sup>

<sup>1</sup>State key laboratory of new ceramics and fine processing, School of Materials Science and Engineering, Tsinghua University, Beijing 100084, P. R. China

<sup>2</sup>Key Laboratory of Advanced Materials of Ministry of Education of China, School of Materials Science and Engineering, Tsinghua University, Beijing 100084, P. R. China

<sup>3</sup>Department of Chemistry, Center for Frontier Polymer Research, Tsinghua University, Beijing 100084, P.R. China

<sup>4</sup>Beijing Laboratory of Biomedical Materials, Beijing University of Chemical Technology, Beijing 100029, P.R. China

<sup>5</sup>Department of Interventional Radiology, Nanfang Hospital, Southern Medical University, Guangzhou 510515, Guangdong Province, China

<sup>6</sup>Guangdong Key Lab of Orthopedic Technology and Implant Materials, Key Laboratory of Trauma & Tissue Repair of Tropical Area of PLA, Guangzhou General Hospital of Guangzhou Military Command, Guangzhou 510010, China

## Computer simulation

The Specific heat of saline solution and s-HY respectively at 25°C was measured by the Thermal Analysis instrument and the calculation equation was as follow:

$$\frac{Cp}{Cp'} = \frac{(y - y_{baseline})m'}{(y' - y_{baseline})m} \quad (1)$$

Where  $Cp$  was the sample's specific heat,  $Cp'$  was the sapphire's specific heat,  $y$  and  $y'$  were the heat flow value of sample and the sapphire respectively, and  $m$  was the weight of test samples. The specific heat of sapphire at 25°C was 0.7788 J/(g · °C). The weight of sapphire, s-HY and saline solution were 22.56mg, 23.15mg and 24.78mg respectively.

Therefore, the value was calculated by combining Figure S1 and equation (1).

$$Cp_{(s-HY)} = 4.11617 \text{ J/(g} \cdot \text{°C)} \text{ and } Cp_{(saline\ solution)} = 4.11565 \text{ J/(g} \cdot \text{°C)}.$$

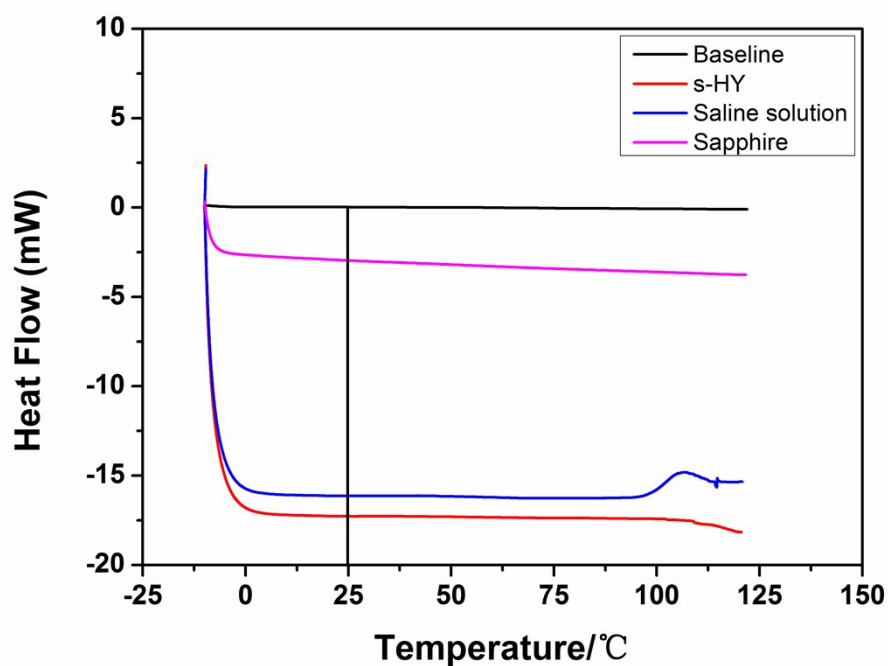

Figure S1. The Thermal Analysis profile of the s-HY and saline solution.
